# Supplementary material for: Biased news sharing and partisan polarization on social media
Source: Research Square preprint supplement (doi:10.21203/rs.3.rs-3611040/v1), 2023-11-20
Supplement: Supplementary file 1 [file 726dcb53114a1311c2589c28.pdf]

# Biased news sharing and partisan polarization on social media

## Supplementary information

Sofía M. del Pozo<sup>1,2</sup>, Sebastián Pinto<sup>1,2</sup>, Matteo Serafino<sup>3</sup>, Lucio Garcia<sup>1,2</sup>, Hernán A. Makse<sup>3</sup> and Pablo Balenzuela<sup>1,2</sup>.

<sup>1</sup> Universidad de Buenos Aires, Facultad de Ciencias Exactas y Naturales, Departamento de Física.  
Buenos Aires, Argentina.

<sup>2</sup> CONICET - Universidad de Buenos Aires, Instituto de Física Interdisciplinaria y Aplicada (INFINA).  
Buenos Aires, Argentina.

<sup>3</sup> Levich Institute and Physics Department, City College of New York, 10031 New York, USA.

## 1 News articles by partisans

Figure 1 shows the amount of news articles shared by users with Center-Left and Center-Right leanings for each media outlet. Media outlets in red were excluded from the  $\bar{S}B$  analysis in Fig. 3 of the main text.

## 2 Topics of news articles

Figure 2 shows the wordclouds of the topics cited in the main text. Tables 1 and 2 shows examples of related articles for each topic.

## Competing Interests Statement

The authors declare that they have no known competing financial interests or personal relationships that could have appeared to influence the work reported in this paper.

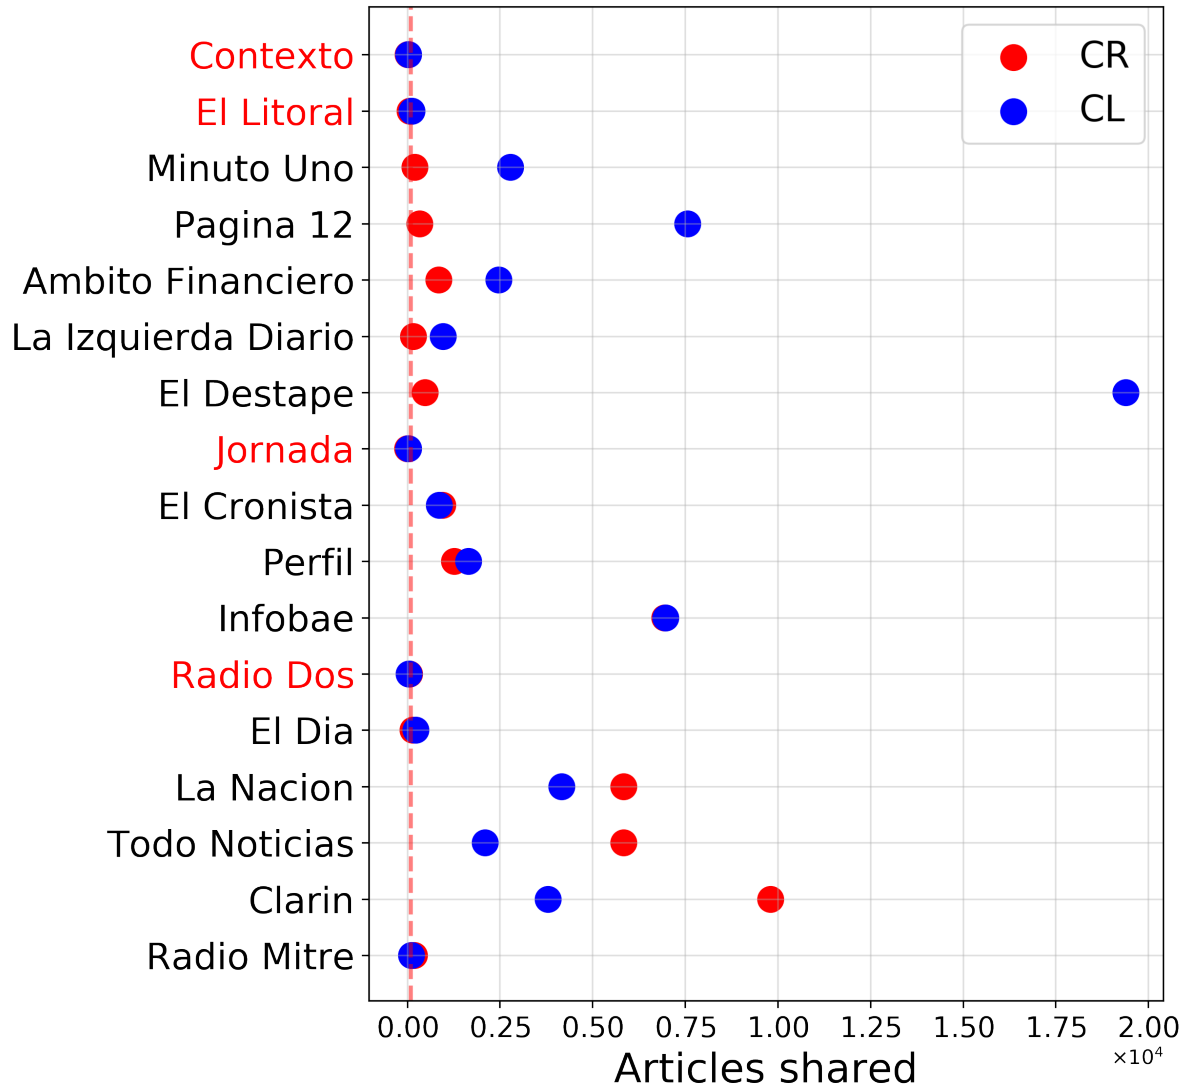

Figure 1: **Amount of news articles shared by users with Center-Left (blue) and Center-Right (red) leanings.** The red line represents the threshold of 100, which is when we began including media outlets for  $\bar{S}B$  analysis in Fig. 3 in the main text. Media outlets in red have less than 100 news articles shared by at least one group of users.

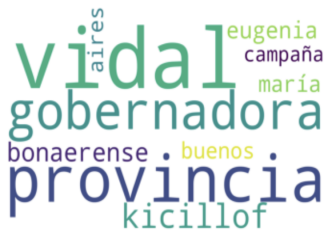

(a) Politics BA province.

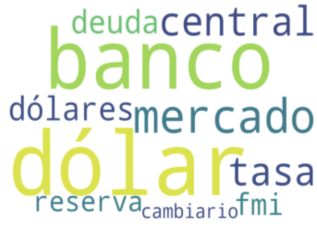

(b) Economy/Dolar.

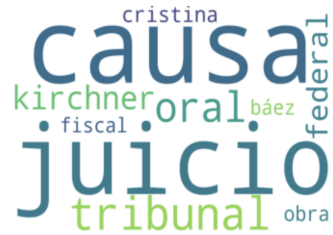

(c) Justice.

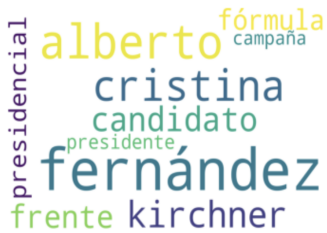

(d) Politics CL.

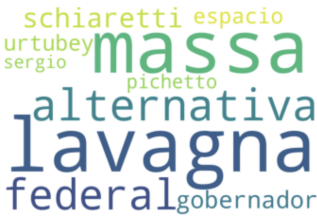

(e) 3rd Party.

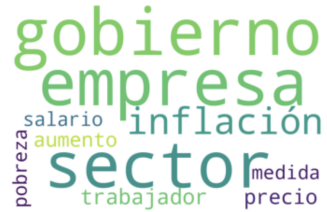

(f) Wage/Inflation.

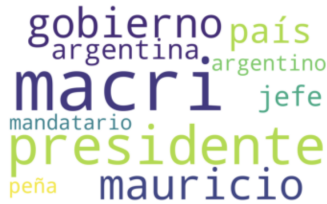

(g) Politics CR.

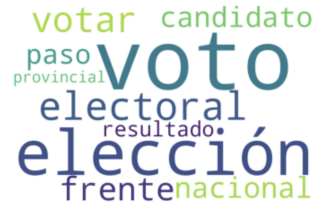

(h) Elections.

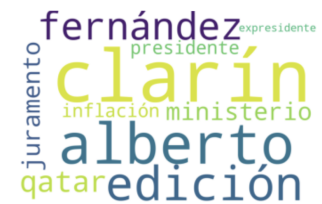

(i) Trash topic.

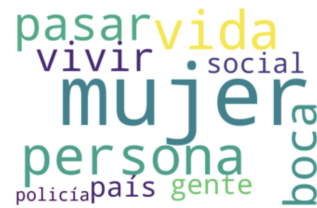

(j) Gossip & Sports.

Figure 2: Wordcloud of topics. Example articles are referred in each case.

| <b>Topics</b>        | <b>Examples of News Articles</b>                                                                                                                                                                                                                                                                                                                     |
|----------------------|------------------------------------------------------------------------------------------------------------------------------------------------------------------------------------------------------------------------------------------------------------------------------------------------------------------------------------------------------|
| Politics BA Province | El Destape: "Debate 2019: qué dijo María Eugenia Vidal tras el fallido de Macri en el que dio a Kicillof como gobernador" [1],<br>Pagina 12: "Un café amargo para María Eugenia Vidal" [2],<br>La Nacion: "Así es la cumbia de Vidal que busca captar el voto bonaerense" [3]                                                                        |
| Economy/Dolar        | La Nacion: "El dólar subió hoy 80 centavos por la pelea de Trump con China" [4],<br>El Destape: "Dólar hoy: subió más de 30 centavos y cerró a \$ 40,13" [5],<br>Todo Noticias: "El Banco Central y las elecciones: dólar bajo control hasta las PASO y tasas altas por cinco meses" [6]                                                             |
| Justice              | Infobae: "La Fiscalía solicitó unificar las causas 'Hotesur' y 'Los Sauces' y que Cristina Kirchner sea juzgada en un solo juicio oral" [7],<br>La Nacion: "Cristina fue a Comodoro Py para notificarse de los nuevos procesamientos" [8],<br>Todo Noticias: "Lázaro Báez pidió suspender el juicio que tiene a Cristina como principal acusada" [9] |
| Politics CL          | La Nacion: "Los mejores memes por el anuncio de Cristina Kirchner como vicepresidenta de Alberto Fernández" [10],<br>El Destape: "Alberto Fernández le contestó a Cambiemos: 'Cristina no es Perón y yo no soy Cámpora'" [11],<br>Pagina 12: "Romano: 'La figura de Alberto Fernández es inspiradora'" [12]                                          |
| 3rd Party            | La Nacion: "Lifschitz y Stolbizer evitaron una ruptura definitiva de Lavagna con Alternativa Federal" [13],<br>Todo Noticias: "Roberto Lavagna: 'No hubo ninguna ruptura con Alternativa Federal, todos los diálogos están abiertos'" [14],<br>Pagina 12: "Tensión en el peronismo disidente por la estrategia electoral" [15]                       |
| Wage/Inflation       | Clarín: "A marzo, los sueldos perdieron 10,5% de su poder adquisitivo" [16],<br>Pagina 12: "Fuerte retroceso de la industria" [17],<br>El Destape: "La eliminación del IVA beneficiará más a sectores de mayor ingreso que a los más pobres" [18]                                                                                                    |
| Politics CR          | Pagina 12: "Macri se compara con San Martín" [19],<br>El Destape: "El insólito audio de Faurie a Macri contándole el acuerdo entre Mercosur – Unión Europea" [20],<br>Clarín: "Mauricio Macri, en modo campaña en un acto por el 25 de Mayo: 'Volver atrás sería destruirnos'" [21]                                                                  |

Table 1

| Topics         | Examples of News Articles                                                                                                                                                                                                                                                                                   |
|----------------|-------------------------------------------------------------------------------------------------------------------------------------------------------------------------------------------------------------------------------------------------------------------------------------------------------------|
| Elections      | Pagina 12: "Los datos crudos del escrutinio definitivo" [22],<br>La Nacion: "Resultados de las Elecciones en Antártida Argentina: seguí el recuento de votos de las PASO" [23],<br>Clarín: "Voto en blanco: no se contará en octubre y hay más chance de definir en primera vuelta" [24]                    |
| Trash topic    | Clarín: "'Esto no es sarasa': el video de Mauricio Macri en la celebración de los 10 años de los centros de Primera Infancia" [25],<br>Clarín: "Massa: 'Los voy a meter presos'" [26],<br>Clarín: "La obra en el arroyo el Gato y el 'autohomenaje' de Macri" [27]                                          |
| Gossip & Sport | "El deseo de buena suerte de Alessandro Del Piero antes del debut de Daniele De Rossi" [28],<br>"'¿Quién es ese? No lo conozco, lo veré en el Monumental': el 'Beto' Alonso menospreció a Daniele De Rossi" [29],<br>"De Rossi se dio el gusto: cómo vivió su primer partido con Boca en la Bombonera" [30] |

Table 2

## References

- [1] *Debate 2019: qué dijo María Eugenia Vidal tras el fallido de Macri en el que dio a Kicillof como gobernador.* <https://www.eldestapeweb.com/nota/debate-2019-que-dijo-maria-eugenia-vidal-tras-el-fallido-de-macri-en-el-que-dio-a-kicillof-como-gobernador-201910159140>.
- [2] *Un café amargo para María Eugenia Vidal.* <https://www.pagina12.com.ar/216327-un-cafe-amargo-para-maria-eugenia-vidal>.
- [3] *Así es la cumbia de Vidal que busca captar el voto bonaerense.* <https://www.lanacion.com.ar/politica/asi-es-cumbia-vidal-busca-captar-voto-nid2272995/>.
- [4] *El dólar subió hoy 80 centavos por la pelea de Trump con China.* <https://www.lanacion.com.ar/economia/dolar/la-pelea-trump-china-le-pone-mas-nid2274338/>.
- [5] *Dólar hoy: subió más de 30 centavos y cerró a \$ 40,13.* <https://www.eldestapeweb.com/dolar-hoy-subio-mas-30-centavos-y-cerro-4013-n56710>.
- [6] *El Banco Central y las elecciones: dólar bajo control hasta las PASO y tasas altas por cinco meses.* [https://tn.com.ar/economia/el-banco-central-y-las-elecciones-dolar-bajo-control-hasta-las-paso-y-tasas-altas-por-cinco-meses\\_980295/](https://tn.com.ar/economia/el-banco-central-y-las-elecciones-dolar-bajo-control-hasta-las-paso-y-tasas-altas-por-cinco-meses_980295/).
- [7] *La Fiscalía solicitó unificar las causas "Hotesur" y "Los Sauces" y que Cristina Kirchner sea juzgada en un solo juicio oral.* <https://www.infobae.com/politica/2019/03/28/la-fiscalia-solicito-unificar-las-causas-hotesur-y-los-sauces-y-que-cristina-kirchner-sea-juzgada-en-un-solo-juicio-oral/>.
- [8] *Cristina fue a Comodoro Py para notificarse de los nuevos procesamientos.* <https://www.lanacion.com.ar/politica/cristina-fue-comodoro-py-notificarse-nuevos-procesamientos-nid2232956/>.

- [9] *Lázaro Báez pidió suspender el juicio que tiene a Cristina como principal acusada.* [https://tn.com.ar/politica/lazaro-baez-pidio-suspender-el-primer-juicio-cristina-por-corrupcion\\_963358/](https://tn.com.ar/politica/lazaro-baez-pidio-suspender-el-primer-juicio-cristina-por-corrupcion_963358/).
- [10] *Los mejores memes por el anuncio de Cristina Kirchner como vicepresidenta de Alberto Fernández.* <https://www.lanacion.com.ar/politica/los-mejores-memes-anuncio-cristina-kirchner-como-nid2249212/>.
- [11] *Alberto Fernández le contestó a Cambiemos: "Cristina no es Perón y yo no soy Cámpora".* <https://www.eldestapeweb.com/c60160>.
- [12] *Romano: "La figura de Alberto Fernández es inspiradora".* <https://www.pagina12.com.ar/449426-romano-la-figura-de-alberto-fernandez-es-inspiradora>.
- [13] *Lifschitz y Stolbizer evitaron una ruptura definitiva de Lavagna con Alternativa Federal.* <https://www.lanacion.com.ar/politica/lifschitz-stolbizer-evitaron-ruptura-definitiva-lavagna-alternativa-nid2250539/>.
- [14] *Roberto Lavagna: "No hubo ninguna ruptura con Alternativa Federal, todos los diálogos están abiertos".* [https://tn.com.ar/politica/roberto-lavagna-no-hubo-una-ruptura-con-alternativa-federal-sino-diferencias\\_964627/](https://tn.com.ar/politica/roberto-lavagna-no-hubo-una-ruptura-con-alternativa-federal-sino-diferencias_964627/).
- [15] *Tensión en el peronismo disidente por la estrategia electoral.* <https://www.pagina12.com.ar/195430-tension-en-el-peronismo-disidente-por-la-estrategia-electora>.
- [16] *A marzo, los sueldos perdieron 10,5% de su poder adquisitivo.* [https://www.clarin.com/economia/economia/marzo-sueldos-perdieron-10-poder-adquisitivo\\_0\\_7Sa7fPyvR.html](https://www.clarin.com/economia/economia/marzo-sueldos-perdieron-10-poder-adquisitivo_0_7Sa7fPyvR.html).
- [17] *Fuerte retroceso de la industria.* <https://www.pagina12.com.ar/204353-fuerte-retroceso-de-la-industria>.
- [18] *La eliminación del IVA beneficiará más a sectores de mayor ingreso que a los más pobres.* <https://www.eldestapeweb.com/nota/la-eliminacion-del-iva-beneficiara-mas-a-sectores-de-mayor-ingreso-que-a-los-mas-pobres-201982617140>.
- [19] *Macri se compara con San Martín.* <https://www.pagina12.com.ar/449941-macri-se-compara-con-san-martin>.
- [20] *El insólito audio de Faurie a Macri contándole el acuerdo entre Mercosur – Unión Europea.* <https://www.eldestapeweb.com/nota/el-insolito-audio-de-faurie-a-macri-contandole-el-acuerdo-entre-mercotur-union-europea-20196281590>.
- [21] *Mauricio Macri, en modo campaña en un acto por el 25 de Mayo: "Volver atrás sería destruirnos".* [https://www.clarin.com/politica/mauricio-macri-modo-campana-acto-25-mayo-volver-destruirnos\\_0\\_U9751Z07h.html](https://www.clarin.com/politica/mauricio-macri-modo-campana-acto-25-mayo-volver-destruirnos_0_U9751Z07h.html).
- [22] *Los datos crudos del escrutinio definitivo.* <https://www.pagina12.com.ar/201768-los-datos-crudos-del-escrutinio-definitivo>.
- [23] *Resultados de las Elecciones en Antártida Argentina: seguí el recuento de votos de las PASO.* <https://www.lanacion.com.ar/politica/resultados-de-las-elecciones-en-antartida-argentina-segui-el-recuento-de-votos-nid2280334/>.
- [24] *Voto en blanco: no se contará en octubre y hay más chance de definir en primera vuelta.* [https://www.clarin.com/politica/voto-blanco-contara-octubre-chance-definir-primera-vuelta\\_0\\_WYzHzdszB.html](https://www.clarin.com/politica/voto-blanco-contara-octubre-chance-definir-primera-vuelta_0_WYzHzdszB.html).

- [25] *"Esto no es sarasa": el video de Mauricio Macri en la celebración de los 10 años de los centros de Primera Infancia.* [https://www.clarin.com/politica/sarasa-video-mauricio-macri-celebracion-10-anos-centros-primera-infancia\\_3\\_FuZVIgtG3.html](https://www.clarin.com/politica/sarasa-video-mauricio-macri-celebracion-10-anos-centros-primera-infancia_3_FuZVIgtG3.html).
- [26] *Massa: "Los voy a meter presos".* [https://www.clarin.com/politica/massa-voy-meter-presos\\_3\\_S1xG3wPngz.html](https://www.clarin.com/politica/massa-voy-meter-presos_3_S1xG3wPngz.html).
- [27] *La obra en el arroyo el Gato y el "autohomenaje" de Macri.* [https://www.clarin.com/videos/obra-arroyo-gato-autohomenaje-macri\\_3\\_1uyuSPoA4.html](https://www.clarin.com/videos/obra-arroyo-gato-autohomenaje-macri_3_1uyuSPoA4.html).
- [28] *El deseo de buena suerte de Alessandro Del Piero antes del debut de Daniele De Rossi.* [https://www.clarin.com/boca-juniors/deseo-buena-suerte-alessandro-piero-debut-daniele-rossi\\_0\\_g3kWd1TQQ.html](https://www.clarin.com/boca-juniors/deseo-buena-suerte-alessandro-piero-debut-daniele-rossi_0_g3kWd1TQQ.html).
- [29] *"¿Quién es ese? No lo conozco, lo veré en el Monumental": el "Beto" Alonso menospreció a Daniele De Rossi.* <https://www.infobae.com/deportes-2/2019/08/13/quien-es-ese-no-lo-conozco-lo-vere-en-el-monumental-el-beto-alonso-menosprecio-a-daniele-de-rossi/>.
- [30] *De Rossi se dio el gusto: cómo vivió su primer partido con Boca en la Bombonera.* <https://www.lanacion.com.ar/deportes/futbol/de-rossi-se-dio-gusto-como-vivio-nid2278767/>.
